# Supplementary figures and images for: A missense, loss-of-function YARS1 variant in a patient with proximal-predominant motor neuropathy
Source: PubMed Central journal article supplement — Cold Spring Harb Mol Case Stud. 2022 Dec;8(7):a006246. doi: 10.1101/mcs.a006246 (PMC9808560; doi:10.1101/mcs.a006246), 2022-12

**A**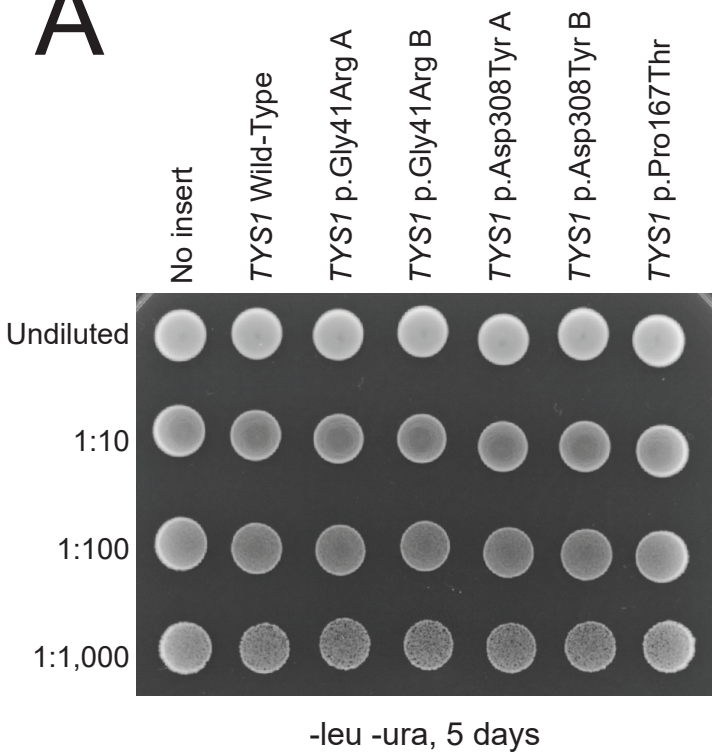**B**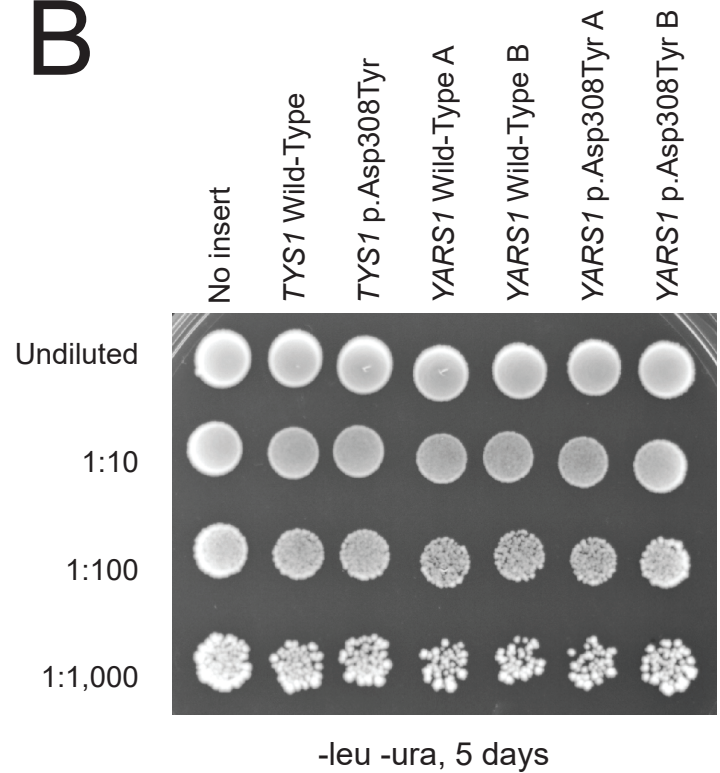**C**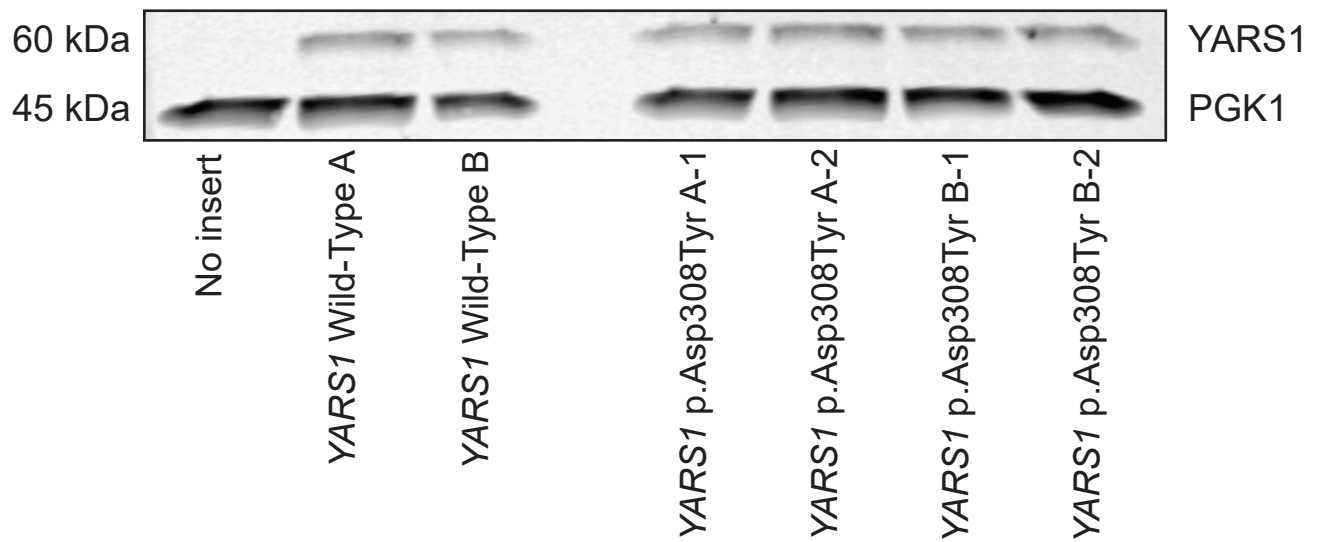**D**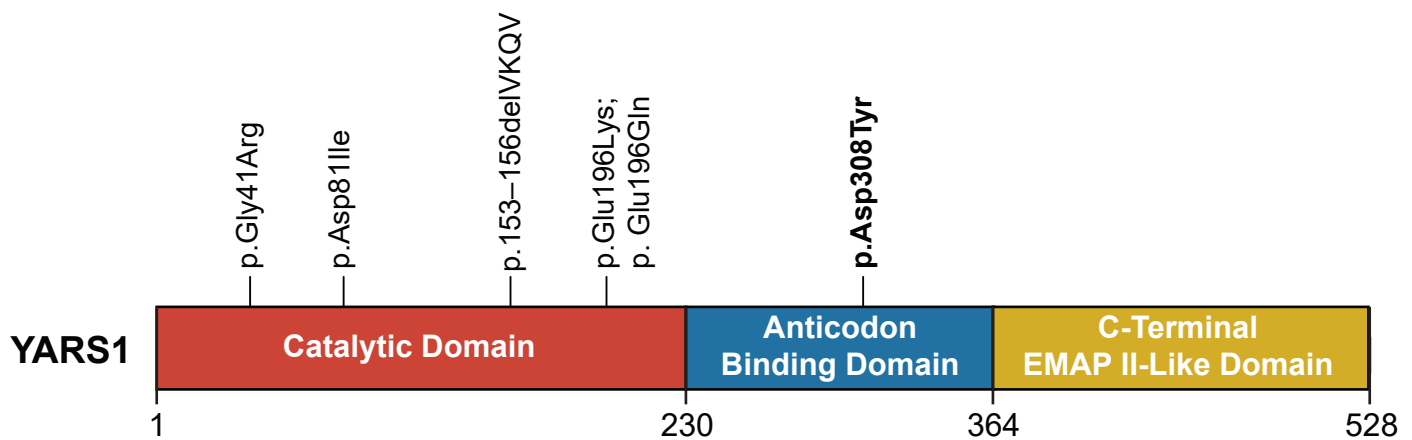

Supplement: supp_mcs.a006246_Supplemental_Figure_1.pdf [file supp_mcs.a006246_Supplemental_Figure_1.pdf]
